# Supplementary material for: Iron uptake mediated by the plant-derived chelator nicotianamine in the small intestine
Source: PubMed Central journal article supplement (PMC7948497; doi:10.1074/jbc.ra120.015861), 2020-12-25
Supplement: mmc1.pdf [file mmc1.pdf]

## **Iron uptake mediated by the plant-derived chelator nicotianamine in the small intestine**

Yoshiko Murata<sup>1,\*</sup>, Masami Yoshida<sup>1</sup>, Naho Sakamoto<sup>1</sup>, Shiho Morimoto<sup>1</sup>, Takehiro Watanabe<sup>1</sup>  
and Kosuke Namba<sup>2</sup>

<sup>1</sup>Bioorganic Research Institute, Suntory Foundation for Life Sciences, 8-1-1 Seikadai, Seika-cho, Soraku-gun, Kyoto 619-0284, Japan

<sup>2</sup>Graduate School of Pharmaceutical Science, Tokushima University, Shomachi 1-78-1, Tokushima, 770-8505, Japan

\*Corresponding author:

Yoshiko Murata Ph.D.

Bioorganic Research Institute, Suntory Foundation for Life Sciences  
8-1-1 Seikadai, Seika-cho, Soraku-gun, Kyoto 619-0284, Japan

Tel: +81-50-3182-0705

Fax: +81-774-98-6292

E-mail: [murata@sunbor.or.jp](mailto:murata@sunbor.or.jp)

**File Name:** Supporting Information

**Description:** 7 Supporting Figures and 1 Supporting Table

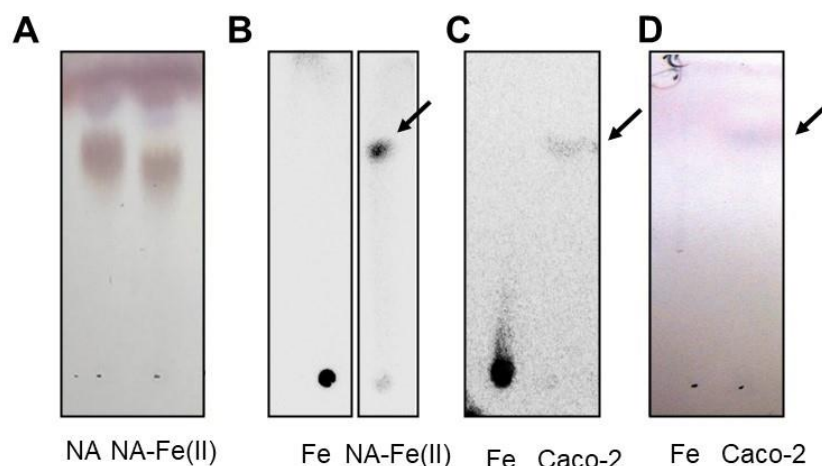

**Figure. S1** Thin-layer chromatography (TLC) analysis of NA-Fe (II) complex. (A) Synthetic NA (16.5 mM, 0.5  $\mu$ L) and NA-Fe(II)(NA/Fe=1:1,16.5 mM, 0.5  $\mu$ L) containing 1mM ascorbic acid were detected by ninhydrin staining (detection of amine). (B) 1  $\mu$ L of 3.3 mM  $^{59}\text{Fe}$  and NA- $^{59}\text{Fe}$ (II) were detected by autoradiography on TLC. (C, D) Caco-2 cells were extracted at 30min after administration 1 mM NA- $^{59}\text{Fe}$ (II) and the extract was applied on cellulose TLC with authentic  $^{59}\text{FeSO}_4$ .  $^{59}\text{Fe}$  was detected by autoradiography on TLC (C) and the amino acid was detected with ninhydrin staining (D). The bands corresponding to NA-Fe(II) ( $R_f=0.67$ ) were indicated with arrows. All TLC plates were developed with MeCN:H<sub>2</sub>O:AcOH=1:1:0.2.

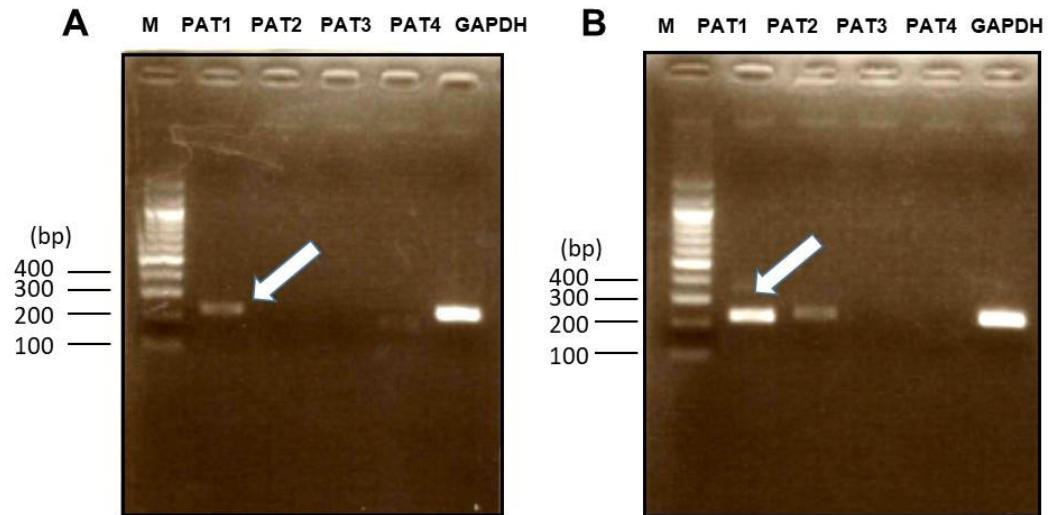

**Figure S2.** mRNA expression of four PAT proteins (PAT1–PAT4) in human intestine and Caco-2 cells evaluated by RT-PCR. RT-PCR from **(A)** human intestine and **(B)** Caco-2 cell RNA of PAT1-4. RT-PCR analysis of the human intestinal and Caco-2 cells revealed that only primers targeting *PAT1* yielded a 228-bp PCR product, indicated by the arrows (Fig. S2A, B). The RT-PCR of targeting human *GAPDH* as control yielded a 238-bp product.

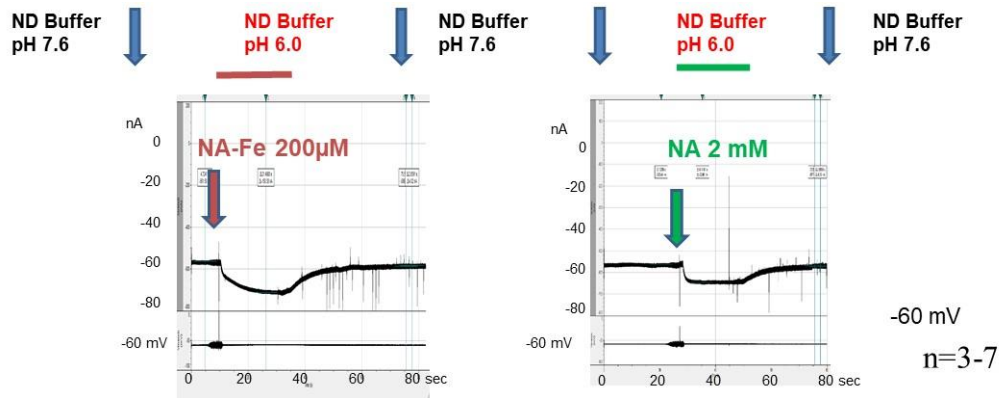

**Figure S3.** Current changes were recorded after the addition of 2 mM nicotianamine (NA) or 200  $\mu\text{M}$  NA-Fe(II). NA/Fe molar ratio = 10:1. *Xenopus laevis* oocytes were voltage-clamped at -60 mV with an OC-725C oocyte clamp (Warner Instruments, Hamden, CT, USA) and were placed in an open chamber with continuous perfusion of ND96 buffer (pH 6.0) or ND96-containing substrates. Steady-state currents were obtained after the addition of NA or NA-Fe(II) complex in 10 mM MES/Tris buffer (pH 6.0). Acquisition and all subsequent analyses were performed using p-Clamp 10 (Molecular Devices, Sunnyvale, CA, USA).

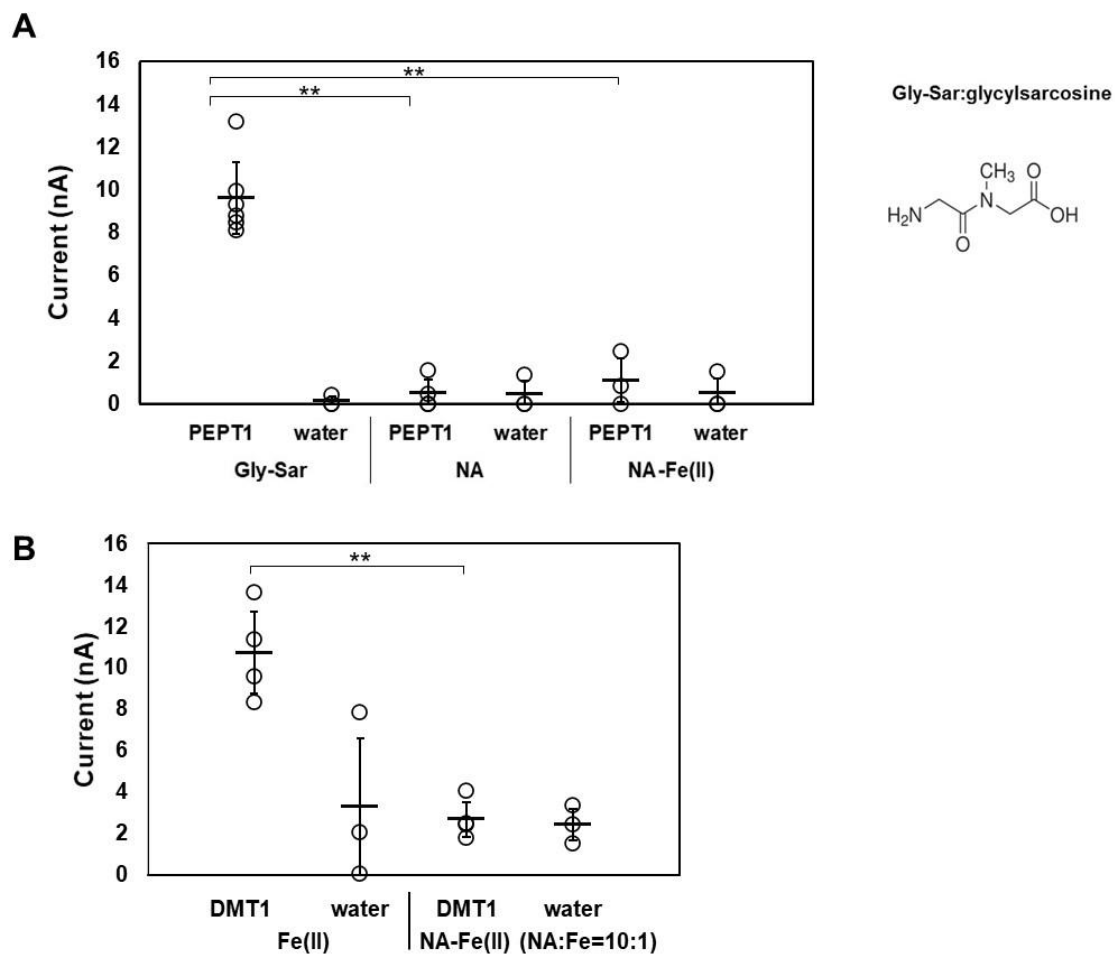

**Figure S4.** Electrophysiological assay of *Xenopus laevis* oocytes expressing hPEPT1 and hDMT1. **(A)** Oocytes were injected with *hPAT1* cRNA or water (as negative control), held at  $-60$  mV during current recording, and superfused with sample buffer (pH 6.0) containing  $500$   $\mu$ M glycylsarcosine (Gly-Sar) ( $n = 6$ ) and  $500$   $\mu$ M NA-Fe (NA/Fe molar ratio = 2:1) ( $n = 3$ ). **(B)** Oocytes were injected with *hDMT1* cRNA or water, and superfused with sample buffer (pH 6.0) containing  $50$   $\mu$ M Fe or  $50$   $\mu$ M NA-Fe(II) (NA/Fe molar ratios = 10:1) ( $n = 4$ ) held at  $-60$  mV. **\*\*** $P < 0.01$

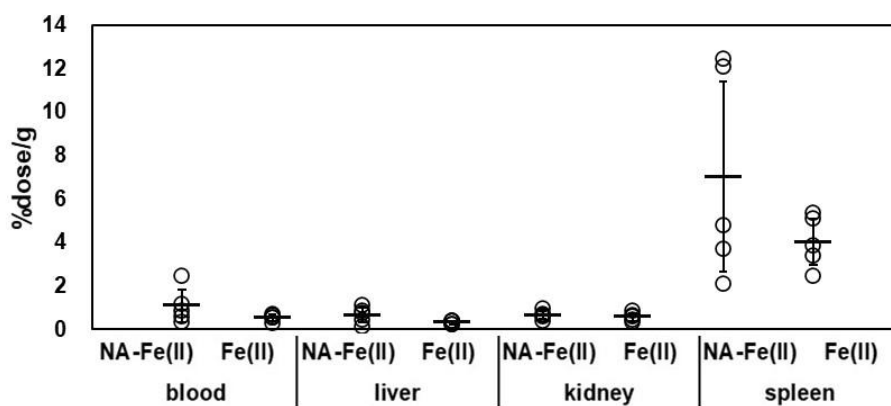

**Figure S5.** Comparison of iron absorption after oral administration of Fe and NA-Fe(II) without fasting.  $^{59}\text{Fe}$  radioactivity was counted in the blood, liver, kidney, and spleen of mice at 5 h after oral administration of NA- $^{59}\text{Fe}(\text{II})$  or  $^{59}\text{Fe}(\text{II})$  ( $n = 7-9$ ). The vertical axis is  $^{59}\text{Fe}$  counts for each organ per gram weight that was expressed as the percentage of total activity of  $^{59}\text{Fe}$  administered to mice.

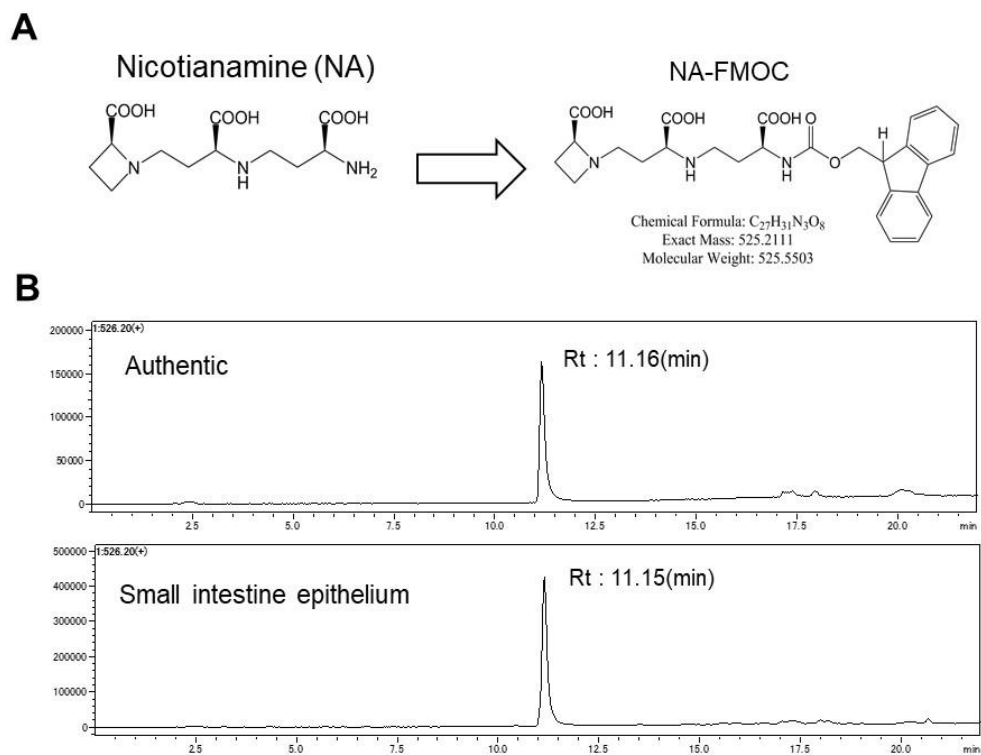

**Figure. S6** Quantitative analysis of NA using 9-fluorenylmethyloxycarbonyl (FMOC) derivatization. Mass spectrometry was operated in the selected ion monitoring mode for observation at  $m/z$  526.2 [NA-FMOC + H]<sup>+</sup> (A) and MS chromatograms of synthetic NA and the extract from small intestine were detected at a retention time (Rt) of 11.15 min (B). Analytical methods are described in the Experimental Procedures section in the manuscript.

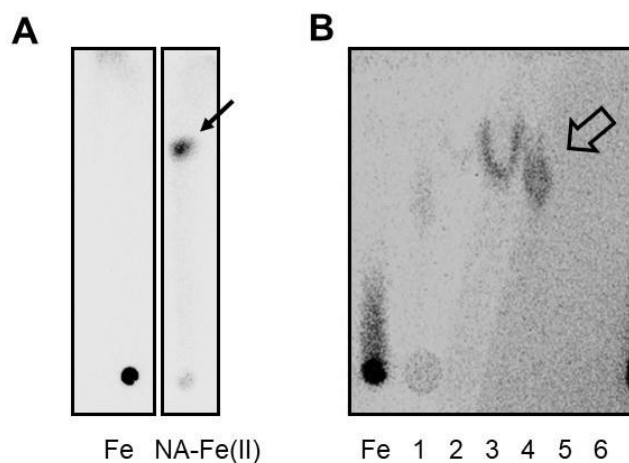

**Figure. S7** Thin-layer chromatography (TLC) analysis of NA-Fe(II) complex in the small intestine. **(A)**  $^{59}\text{Fe}$  and NA- $^{59}\text{Fe}(\text{II})$  (3.3 mM, 1  $\mu\text{L}$ ) were detected by autoradiography on TLC. The bands corresponding to NA- $^{59}\text{Fe}(\text{II})$  ( $R_f=0.67$ ) are indicated by arrows. This panel, which is the same as Fig. S1B, is shown to make it easier to compare the bands corresponding to NA- $^{59}\text{Fe}(\text{II})$  in panels A and B. **(B)** Extracts from mouse upper small intestine (sections 1-6) at 30 min after oral administration of NA- $^{59}\text{Fe}(\text{II})$  were applied to the cellulose TLC.  $^{59}\text{Fe}$  was detected by autoradiography on TLC. The bands ( $R_f=0.6-0.7$ ) are indicated by arrows. All TLC plates were developed with  $\text{MeCN}:\text{H}_2\text{O}:\text{AcOH} = 1:1:0.2$ .



**Table S1. Primers used in the study****Primer sequences for *hPAT1* RNAi Caco-2 cells**

| miR Select Oligo ID | Forward (5' to 3')                                                       | Reverse (5' to 3')                                                       | Targeted regions (bp) |
|---------------------|--------------------------------------------------------------------------|--------------------------------------------------------------------------|-----------------------|
| Hmi 460740          | TGCTGTGAAGATGGGAGCATTGCT<br>TGGTTTTGGCCACTGACTGACCAA<br>GCAATTCCTCATCTCA | GTGAAGATGGGAGCATTGCTTGG<br>TTTTGGCCACTGACTGACCAAGCA<br>ATTCCTCATCTCACAGG | 1608-<br>1628         |
| Hmi 460741          | TGCTGATGATCAGCAGGCTGATGG<br>GAGTTTTGGCCACTGACTGACTCCC<br>ATCACTGCTGATCAT | GATGATCAGCAGGCTGATGGGAG<br>TTTTGGCCACTGACTGACTCCCAT<br>CACTGCTGATCATCAGG | 463-<br>483           |
| Hmi 460743          | TGCTGATCATGACCAAGCTGACCA<br>GCGTTTTGGCCACTGACTGACGCTG<br>GTCATTGGTCATGAT | GATCATGACCAAGCTGACCAGCG<br>TTTTGGCCACTGACTGACGCTGGT<br>CATTGGTCATGATCAGG | 907-<br>927           |

**Primer sequences for Quantitative RT-PCR**

| mouse        | Forward (5' to 3')   | Reverse (5' to 3')   |
|--------------|----------------------|----------------------|
| <i>GAPDH</i> | CTGCACCACCAACTGCTTAG | GTCTTCTGGGTGGCAGTGAT |
| <i>DMT1</i>  | TACCCATCCTCACGTTCA   | TTGATGGAGCAGACGATCAG |
| <i>PAT1</i>  | ACCTGCTGAAAGGCAACATT | CTTCACCAGGATACCCATGC |

| human        | Forward (5' to 3')   | Reverse (5' to 3')   |
|--------------|----------------------|----------------------|
| <i>GAPDH</i> | CCAGGTGGTCTCCTCTGACT | CCCTGTTGCTGTAGCCAAAT |
| <i>DMT1</i>  | GAGTGGTACTGGGCTGCAT  | GCATGTCTGAGCCGATGATA |
| <i>PAT1</i>  | ATGCTGGTCAGCTTGGTCAT | AACCATTCCAATGCCTTCAA |

---

**Primer sequences for RT-PCR**

| human        | Forward (5' to 3')   | Reverse (5' to 3')   | bp  |
|--------------|----------------------|----------------------|-----|
| <i>PAT1</i>  | AAGGCATTGGAATGGTTCTG | TGAAAAAGATCCCGATGGAG | 228 |
| <i>PAT2</i>  | ACGTCCCTGCAGAAATCATC | GGCTCATGCCCTCTGAGTAG | 237 |
| <i>PAT3</i>  | TACTGGGGACACTGGGCTAC | ACACTTGGGAGATGGCAAAC | 186 |
| <i>PAT4</i>  | GGATGTAATGAGGCCCTTGA | TCCTAAAAGGCCAGTTCCAA | 178 |
| <i>GAPDH</i> | GAGTCAACGGATTTGGTCGT | TTGATTTTGGAGGGATCTCG | 238 |

**Primer sequences for cRNA of *Xenopus* oocytes**

| human        | Forward (5' to 3')                                  | Reverse (5' to 3')                                  |
|--------------|-----------------------------------------------------|-----------------------------------------------------|
| <i>PEPT1</i> | GGCCCTCGAGATGGGAATGTCC<br>AAATC ( <i>Xho</i> I)     | GGCCTCTAGATCACATCTGTTTC<br>TGTG ( <i>Xba</i> I)     |
| <i>DMT1</i>  | GGCCCTCGAGATGGTGCTGGGT<br>CCTGA ( <i>Xho</i> I)     | GGCCCCATGGTTATTTAACGTAG<br>CCAC ( <i>Kpn</i> I)     |
| <i>PAT1</i>  | CGGAATTCACCATGTCCACGCA<br>GAGACTTC ( <i>Eco</i> R1) | GGCTCTAGATCCCTACTATATGA<br>AGGCACAG ( <i>Xba</i> I) |
